# Supplementary material for: Electro-elastic properties of a piezoelectric Te2O(PO4)2crystal
Source: Royal Society of Chemistry journal article supplement (doi:10.1039/d2ce00221c), 2022-01-01
Supplement: d2ce00221c1.pdf [file d2ce00221c1.pdf]

## Supporting Information

### Electro-elastic properties of Piezoelectric $\text{Te}_2\text{O}(\text{PO}_4)_2$ Crystal

Weimin Dong <sup>a,1</sup>, Fuan Liu <sup>a,1</sup>, Yingjie Sun <sup>b</sup>, Biao Wang <sup>a</sup>, Mengqi Zhu <sup>a</sup>, Jing Li <sup>a</sup>,

Xinguang Xu <sup>a</sup>, Jiyang Wang <sup>a</sup>

<sup>a</sup> State Key Laboratory of Crystal Materials, Shandong University, Jinan 250100, P. R. China.

<sup>b</sup> School of Materials and Energy, Yunnan University, Kunming 650091, P. R. China.

<sup>1</sup> These authors (Weimin Dong and Fuan Liu) contributed equally to this work.

#### CONTENTS

1. Calculation formula and process of electro-elastic constants.
2. **Table S1.** The crystal cuts and vibration modes for the determination of electro-elastic constants of TPO crystal.

## 1. Calculation formula and process of electro-elastic constants.

The dielectric constants can be obtained by the measured capacitance values according to the following formulas with square plate samples k, l, and j, and circumgyrate sample g:

$$\varepsilon_{ij}^T = \frac{\varepsilon_{ij}^T}{\varepsilon_0} = \frac{C_{ij} \times t}{A \times \varepsilon_0} \quad (i = 1, 2, 3) \# (1)$$

$$\varepsilon_{33}^T(\theta) = \varepsilon_{11}^T \sin^2 \theta + 2\varepsilon_{13}^T \cos \theta \sin \theta + \varepsilon_{33}^T \cos^2 \theta \# (2)$$

where C is the capacitance, t is the thickness, A is the area of the measured sample, and  $\varepsilon_0$  is the vacuum dielectric constant.

$$s^E = \frac{1}{4\rho l f_a^2 (1 - k^2)} \# (3)$$

$$k^2 = \frac{\pi f_r}{2f_a} \cot \frac{\pi(f_r)}{2(f_a)} \# (4)$$

$$d = k\sqrt{\varepsilon s} \# (5)$$

$$s^E = \frac{1}{4\rho w^2 f_a^2 (1 - k^2)} \# (6)$$

$$s^E = \frac{1}{4\rho t^2 f_a^2 (1 - k^2)} \# (7)$$

$$s^E = \frac{1}{4\rho l^2 f_r^2} \# (8)$$

$$\frac{k^2}{1 - k^2} = \frac{\pi f_a}{2f_r} \cot \frac{\pi(f_a)}{2(f_r)} \# (9)$$

$$s_{33}^{\prime}(XZw)\theta = s_{11} \sin^4 \theta + (2s_{13} + s_{55}) \sin^2 \theta \cos^2 \theta + 2s_{15} \sin^3 \theta \cos \theta + s_{33} \cos^4 \theta + 2s_{33} \sin \theta \cos^3 \theta \# (10)$$

$$s_{22}^{\prime}(XYt)45^\circ = (s_{22} + 2s_{23} + s_{44} + s_{33})/4 \# (11)$$

$$s_{11}^{\prime}(XYl)45^\circ = (s_{11} + 2s_{12} + s_{66} + s_{22})/4 \# (12)$$

$$s_{33}^{\prime}(YZw)45^\circ / -45^\circ = \left( \frac{4s_{22} + s_{11} + s_{33} + 2s_{15} + 2s_{13} + s_{55} + 2s_{35}}{+ 4s_{23} + 4s_{12} + 4s_{25} + 2s_{44} + 2s_{66} + 4s_{46}} \right) / 16 \# (13)$$

$$s'_{44}(XYl)45^\circ = 0.5s_{44} + s_{46} + 0.5s_{66} \#(14)$$

$$d'_{13}(XYw)\theta = d_{11}\sin^2\theta\cos\theta - d_{31}\sin^3\theta + d_{13}\cos^3\theta \\ + d_{33}\sin\theta\cos^2\theta + d_{15}\sin\theta\cos^2\theta - d_{35}\sin^2\theta\cos\theta \#(15)$$

$$c = s^{-1} \#(16)$$

Elastic compliance constants  $s_{11}$  and  $s_{33}$  and piezoelectric constants  $d_{11}$  and  $d_{33}$  were calculated using equations (3)-(5) based on samples a and b. When the electric field was applied along the thickness direction of samples c-f, piezoelectric constants  $d_{13}$ ,  $d_{12}$ ,  $d_{32}$ , and  $d_{31}$  and elastic compliance constants  $s_{33}$ ,  $s_{22}$ , and  $s_{11}$  were obtained by equation (5), (8), and (9). Samples c-f were also used to calculate the piezoelectric constants  $d_{35}$ ,  $d_{15}$ ,  $d_{24}$ , and  $d_{26}$  and the elastic constants  $s_{55}$ ,  $s_{44}$ , and  $s_{66}$  by equations (4)-(7), where the electric field was applied along the length direction of the samples. Using the sample g-i and combining equations (8) and (9), the elastic compliance constants  $s_{13}$ ,  $s_{15}$ , and  $s_{35}$  are obtained. Similarly, elastic compliance constants  $s_{23}$ ,  $s_{12}$ , and  $s_{25}$  were obtained in the same way based on samples m-o and equations (8) and (11)-(13). Elastic compliance constant  $s_{46}$  was calculated based on the equations (4), (5), (7), and (14), according to the measurement of the thickness-shear vibration mode of sample p with an electric field applied along the length direction. Samples g and i were also used to verify the sign and value of piezoelectric strain constant  $d_{15}$  according to equation (15). Stiffness coefficients  $c_{ij}$  can be obtained using equation (16).

**Table S1.** The crystal cuts and vibration modes for the determination of electro-elastic constants of TPO crystal.

| Sample                                                             | Modes                                             | Constants                                                            |
|--------------------------------------------------------------------|---------------------------------------------------|----------------------------------------------------------------------|
| X square plate<br>Y square plate<br>Z square plate<br>(XZw)45° bar | -                                                 | $\epsilon_{11}^T, \epsilon_{22}^T, \epsilon_{33}^T, \epsilon_{13}^T$ |
| X rod<br>Z rod                                                     | longitudinal length extensional<br>vibration mode | $d_{11}$<br>$d_{33}$                                                 |
| ZX bar<br>XY bar<br>ZY bar<br>XZ bar                               | longitudinal length extensional<br>vibration mode | $s_{11}, d_{31}$<br>$s_{22}, d_{12}, d_{32}$<br>$s_{33}, d_{13}$     |
| XZ bar<br>XZ bar                                                   | transverse length extensional<br>vibration mod    | $s_{44}, d_{24}$<br>$s_{66}, d_{26}$                                 |
| XZ bar<br>ZX bar                                                   | thickness shear vibration mod                     | $s_{55}, d_{15}, d_{35}$                                             |
| (XZw)45° bar<br>(XZw)30° bar<br>(XZw)-30° bar                      | longitudinal length extensional<br>vibration mode | $s_{13}, s_{15}, s_{35}$                                             |
| (XYt)45° bar<br>(ZXt)45° bar<br>(ZXtw)45°/-45° bar                 | longitudinal length extensional<br>vibration mode | $s_{12}, s_{23}, s_{25}$                                             |
| (XYl)45° bar                                                       | thickness shear vibration mod                     | $s_{46}$                                                             |
